# Supplementary material for: Investigating radical cation chain processes in the electrocatalytic Diels–Alder reaction
Source: publisher site journal article supplement (doi:10.3762/bjoc.14.51), 2018-03-16

## Supporting Information

for

# Investigating radical cation chain processes in the electrocatalytic Diels–Alder reaction

Yasushi Imada<sup>1</sup>, Yohei Okada<sup>2</sup>, and Kazuhiro Chiba\*<sup>1</sup>

Address: <sup>1</sup>Department of Applied Biological Science, Tokyo University of Agriculture and Technology, 3-5-8 Saiwai-cho, Fuchu, Tokyo 183-8509, Japan and <sup>2</sup>Department of Chemical Engineering, Tokyo University of Agriculture and Technology, 2-24-16 Naka-cho, Koganei, Tokyo 184-8588, Japan

Email: Kazuhiro Chiba - chiba@cc.tuat.ac.jp

Tel: (+81)-42-367-5667

Fax: (+81)-42-367-5667

\*Corresponding author

### **Additional figure, general remarks, synthesis and characterization data, including copies of <sup>1</sup>H and <sup>13</sup>C NMR spectra**

Table of contents

1. Additional figure p. S2
2. General remarks p. S3
3. Synthesis and characterization data p. S4
4. Copies of <sup>1</sup>H and <sup>13</sup>C NMR spectra p. S6

## 1. Additional figure

$$ce[\%] = \frac{Q_{theor.}}{Q_{pract.}} \cdot \frac{n_{prodct}}{n_{substrate}} \cdot 100$$

$Q$  = passed charge,  $n$  = amount of substrate

**Figure S1.** Definition of current efficiency.

## 2. General remarks

All reagents and solvents were purchased from commercial sources and used without further purification.

Reactions were monitored by thin-layer chromatography (TLC) carried out on silica gel plates, with detection by UV absorption (254 nm) and by heating the plates after dipping them in a solution of 12 molybdo(VI)phosphoric acid *n*-hydrate in 95% ethanol. Silica gel (particle size 40–50  $\mu\text{m}$ ) was used for column chromatography.  $^1\text{H}$  NMR spectra were collected on 600 or 400 MHz NMR spectrometers using the deuterated solvent as an internal deuterium reference. Chemical shift data are given in  $\delta$  units calibrated with residual protic solvent. The multiplicity of a signal is indicated as follows: s, singlet; d, doublet; t, triplet; q, quartet; quin, quintet; m, multiplet.  $^{13}\text{C}$  NMR spectra were collected on 150 or 100 MHz spectrometers with proton decoupling using the deuterated solvent as an internal carbon reference. Chemical shift data are given in  $\delta$  units calibrated with residual solvent.

### 3. Synthesis and characterization data

#### General procedure for bulk electrolysis

#### 4'-Methoxy-2,4-dimethyl-1,2,3,6-tetrahydro-1,1'-biphenyl (**3**)

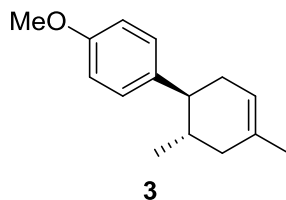

To a solution of lithium perchlorate (1.06 g, 10.0 mmol) in nitromethane (10 mL) stirred at rt was added *trans*-anethole (**1**) (150  $\mu$ L, 1.0 mmol) and isoprene (**2**) (303  $\mu$ L, 3.0 mmol). The resulting reaction mixture was electrolyzed at rt using carbon felt electrodes (2 cm  $\times$  2 cm) in an undivided cell with stirring at a constant potential of 1.0 V vs Ag/AgCl. After completion (monitored by TLC and GC-MS), the reaction mixture was diluted with CH<sub>2</sub>Cl<sub>2</sub> and washed with brine. The organic layer was dried over MgSO<sub>4</sub>, filtered, and concentrated in vacuo to give a crude product as a yellow oil. Silica gel column chromatography (EtOAc/Hex = 1:30) gave the title compound (211.6 mg, 98%). <sup>1</sup>H NMR (CDCl<sub>3</sub>, 600 MHz)  $\delta$  7.08 (2H, d,  $J$  = 8.5 Hz), 6.84 (2H, d,  $J$  = 8.5 Hz), 5.44 (1H, br. s), 3.79 (3H, s), 2.32-2.27 (1H, m), 2.24-2.10 (2H, m), 2.06 (1H, dd,  $J$  = 17.2, 4.5 Hz), 1.93-1.85 (1H, m), 1.83-1.76 (1H, m), 1.69 (3H, s), 0.70 (3H, d,  $J$  = 6.8 Hz); <sup>13</sup>C NMR (150 MHz, CDCl<sub>3</sub>)  $\delta$  157.7, 138.2, 133.8, 128.5, 120.9, 113.7, 55.2, 46.9, 39.8, 35.3, 34.0, 23.4, 20.3.

4,4'-(3,4-Dimethylcyclobutane-1,2-diyl)bis(methoxybenzene) (**4**)

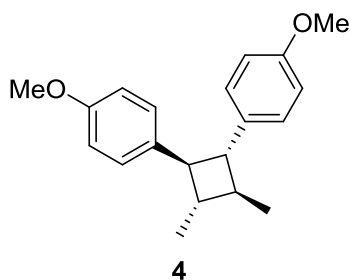

To a solution of lithium perchlorate (1.06 g, 10.0 mmol) in nitromethane (10 mL) stirred at rt was added *trans*-anethole (**1**) (150  $\mu$ L, 1.0 mmol). The resulting reaction mixture was electrolyzed at rt using carbon felt electrodes (2 cm  $\times$  2 cm) in an undivided cell with stirring at a constant potential of 1.0 V vs Ag/AgCl. After the passage of 0.4 F/mol, the reaction mixture was diluted with CH<sub>2</sub>Cl<sub>2</sub> and washed with brine. The organic layer was dried over MgSO<sub>4</sub>, filtered, and concentrated in vacuo to give crude product as a yellow oil. Silica gel column chromatography (EtOAc/Hex = 1:30) gave the title compound (103.5 mg, 35%). Analytical data are in agreement with the literature.<sup>1</sup>

(1) Riener, M.; Nicewicz, D. A. *Chem. Sci.* **2013**, 4, 2625–2629.

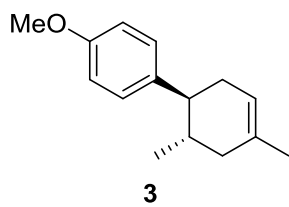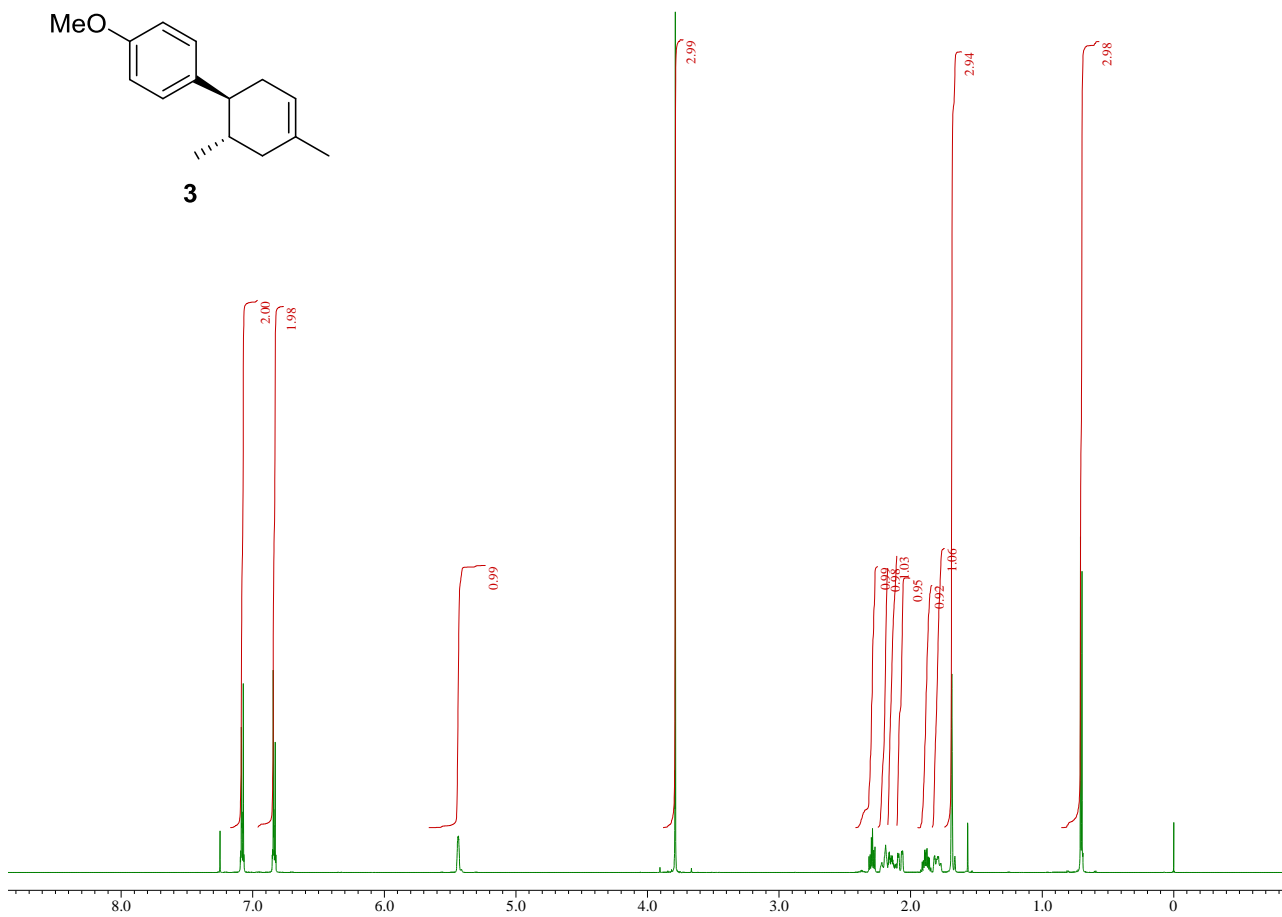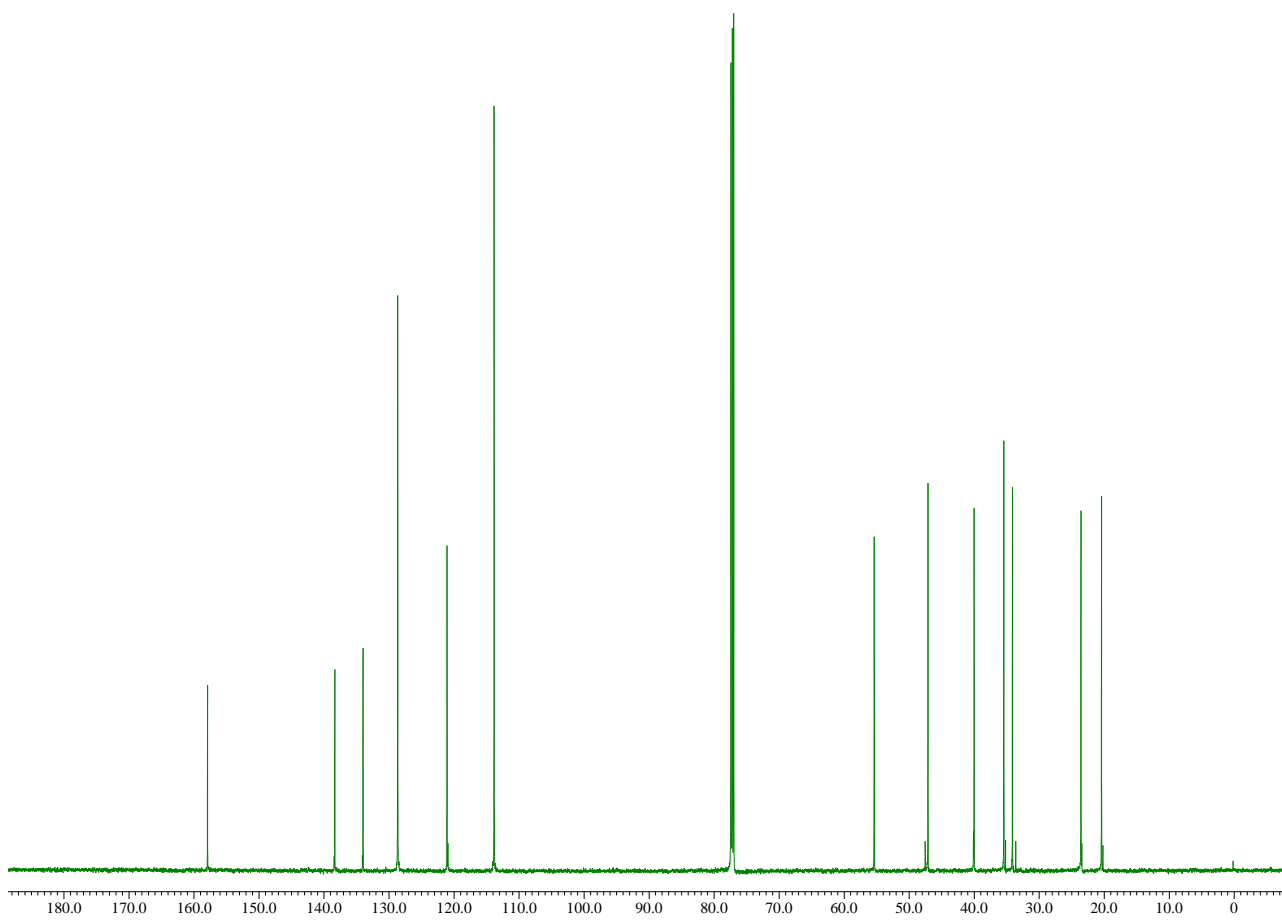

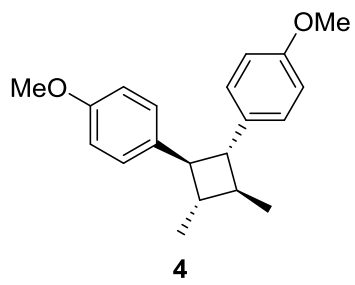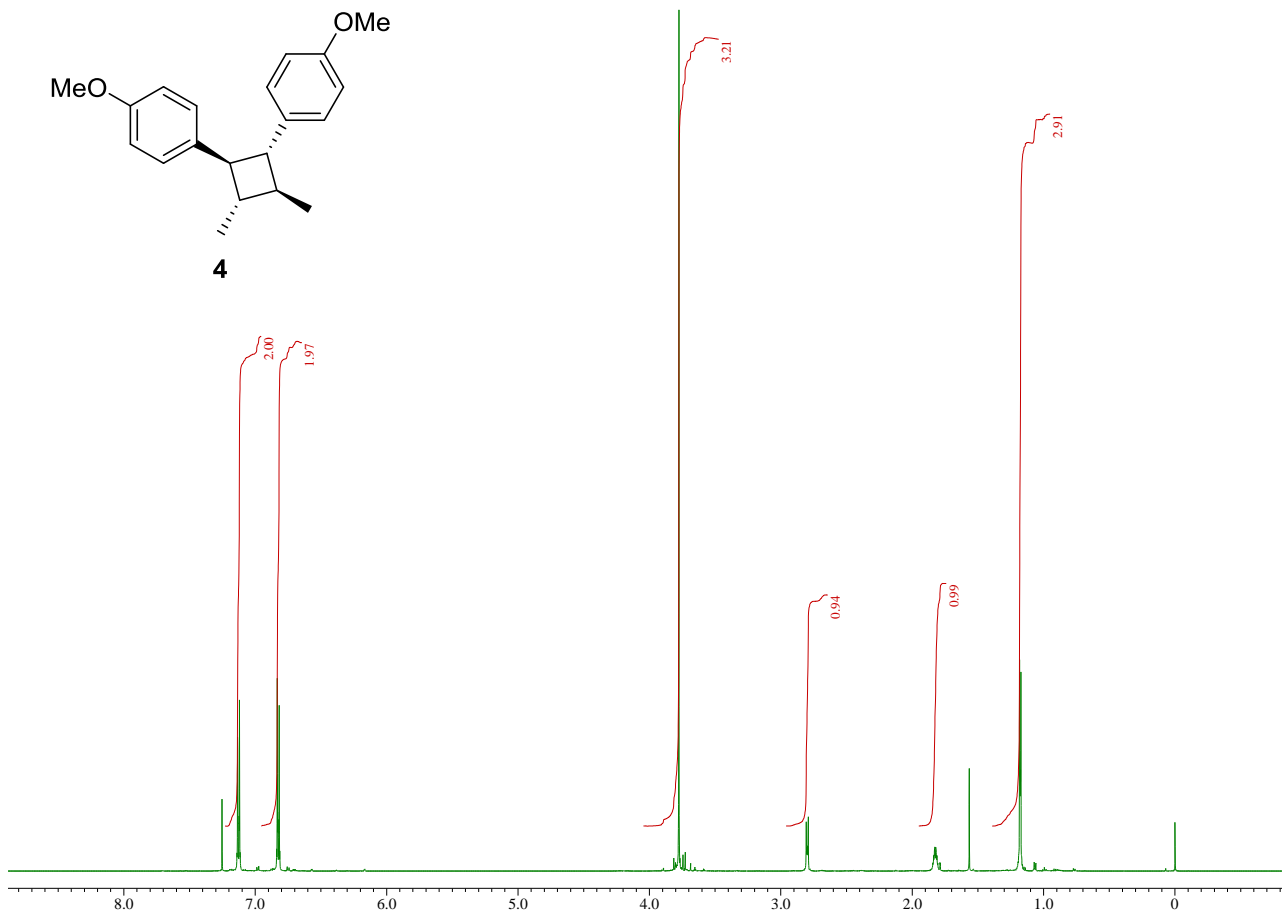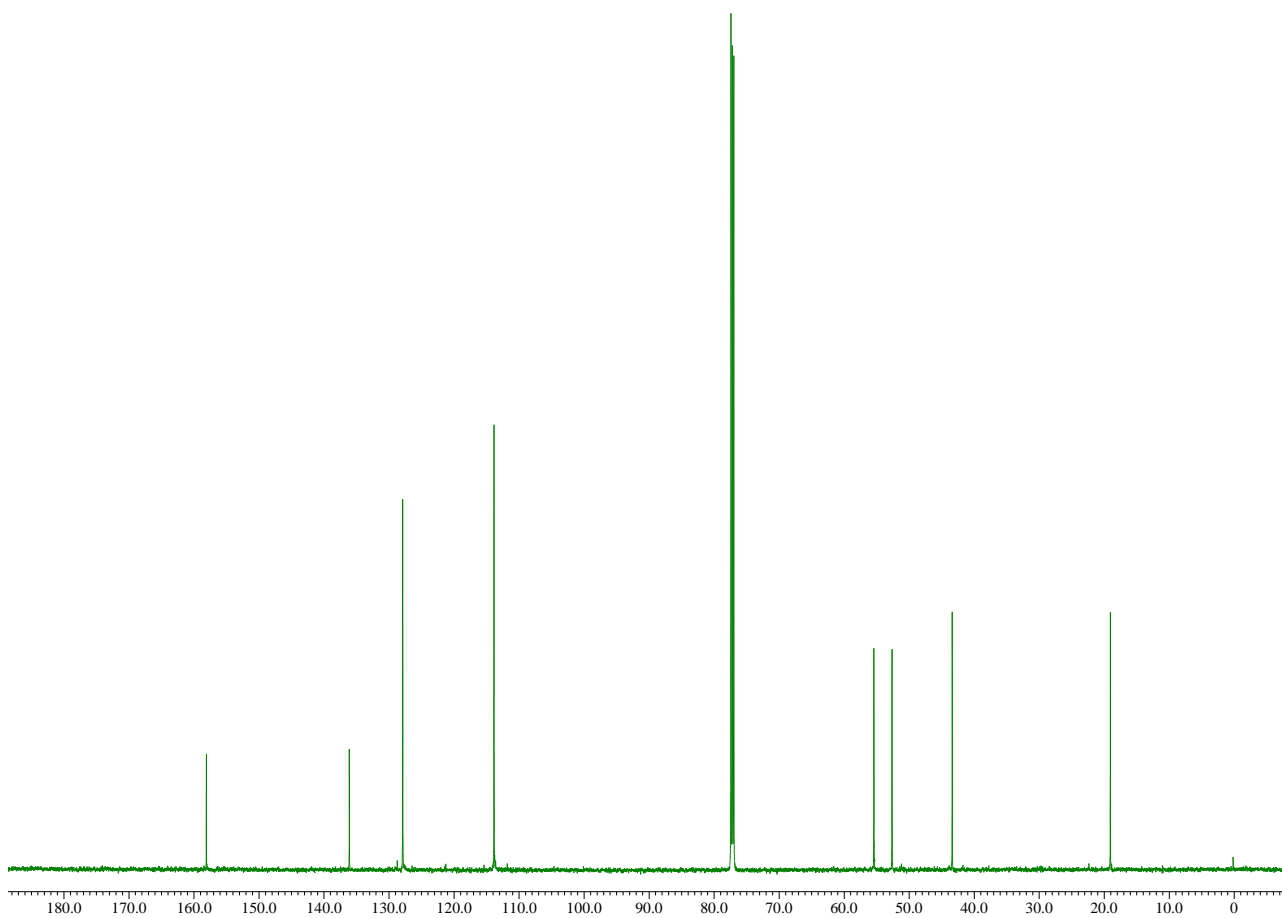

Supplement: Additional file 1 [file 1860-5397-14-51-S1.pdf]
